# Supplementary material for: Pregnancy-Specific Beta-1-Glycoprotein 1 Increases HTR-8/SVneo Cell Migration through the Orai1/Akt Signaling Pathway
Source: MDPI journal article supplement (doi:10.3390/biom14030293), 2024-02-29
Supplement: s1 [file s1]

# Original western blot 1

Orai1 expression was expressed in HTR/8-Svneo cultured in 0, 0.1 or 0.5  $\mu\text{g/mL}$  pregnancy-specific beta-1-glycoprotein 1 (PSG1) medium for 24 h.

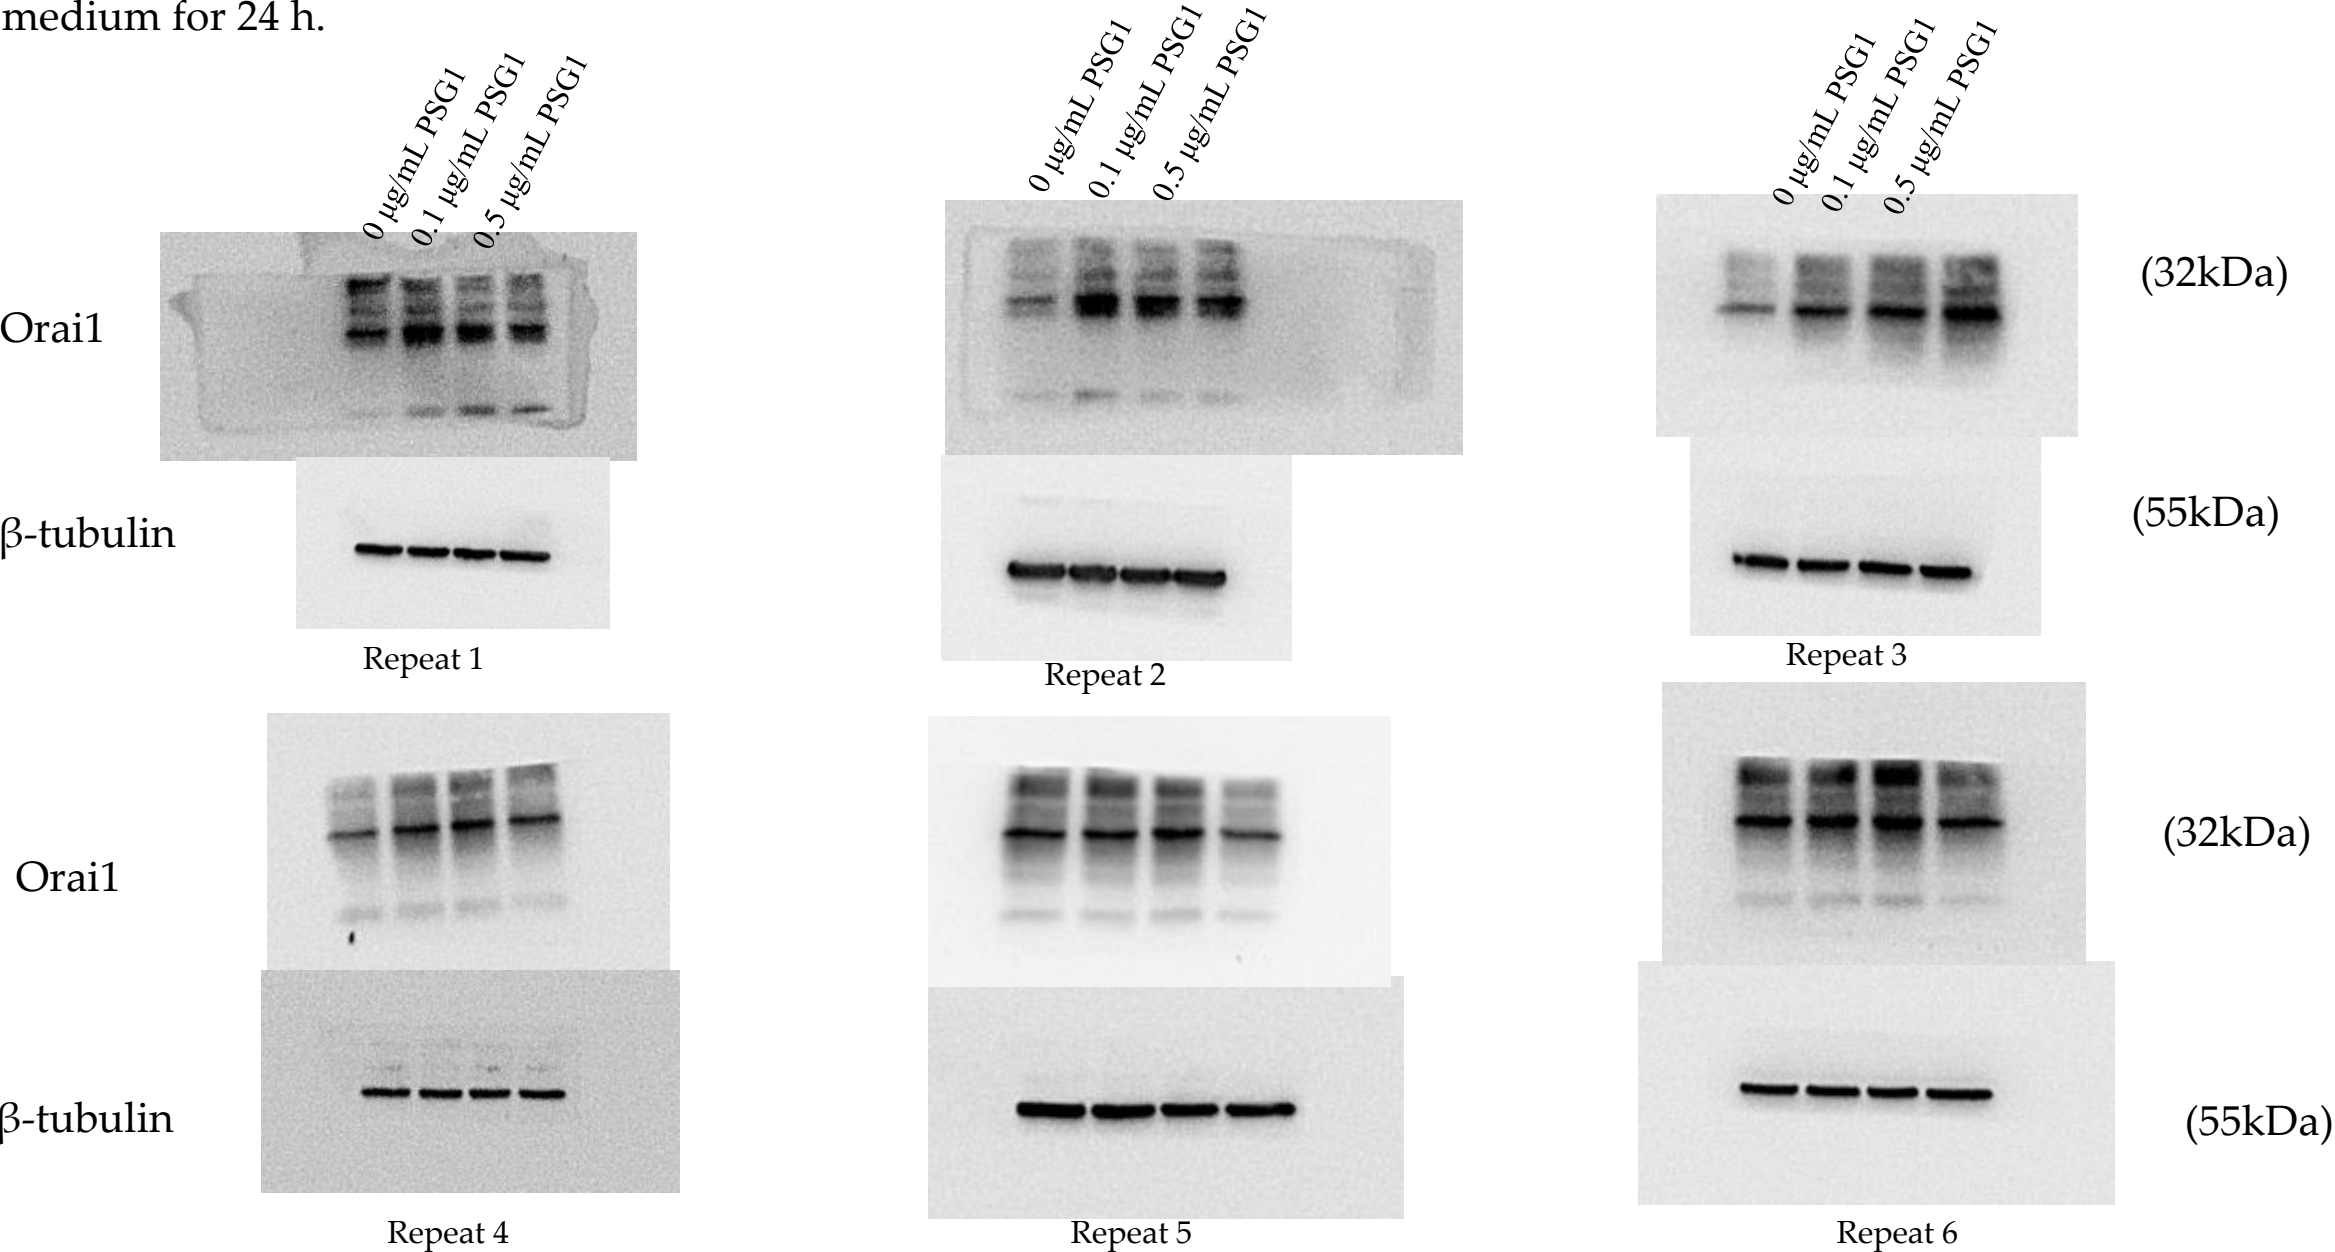

Original western blot 2

Akt/p-Akt expression was expressed in HTR/8-SVneo cells cultured in 10  $\mu$ M MRS1845 and/or 0.1  $\mu$ g/mL ZSTK474 and/or 0.1  $\mu$ g/mL PSG1 medium for 24 h.

p-Akt

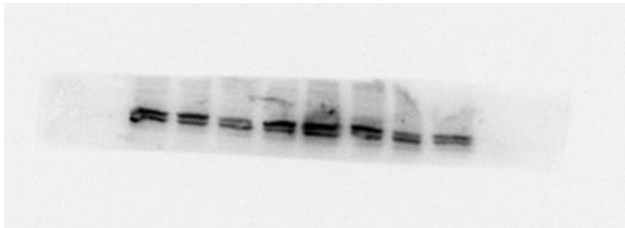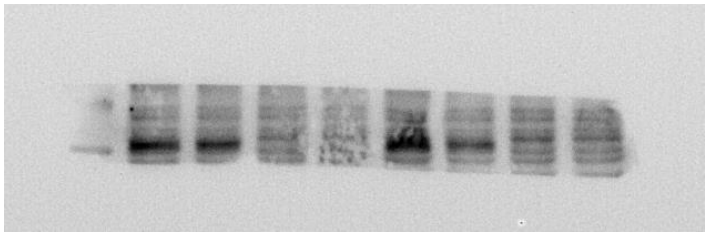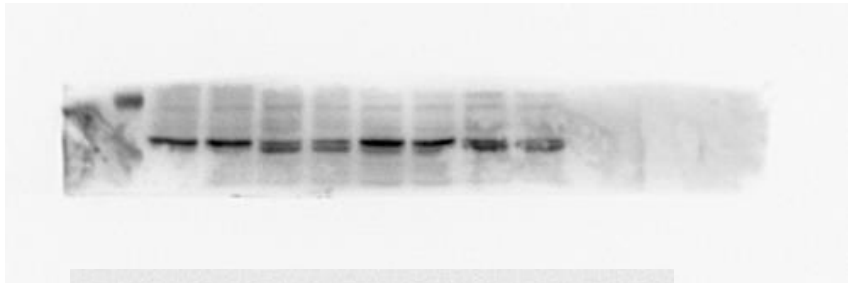

Total Akt

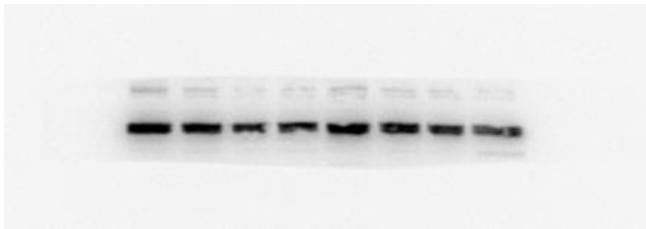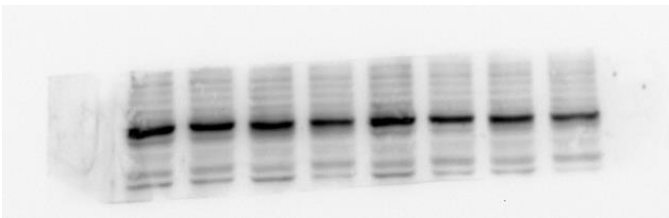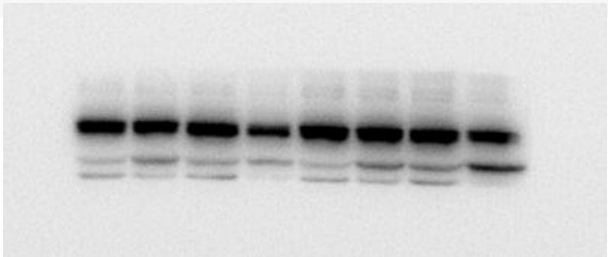

GAPDH

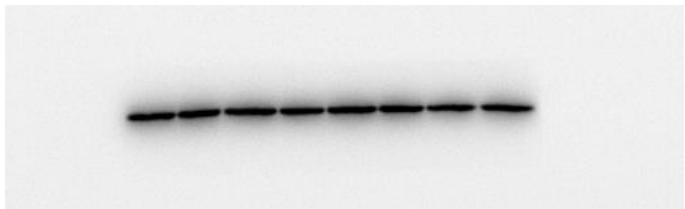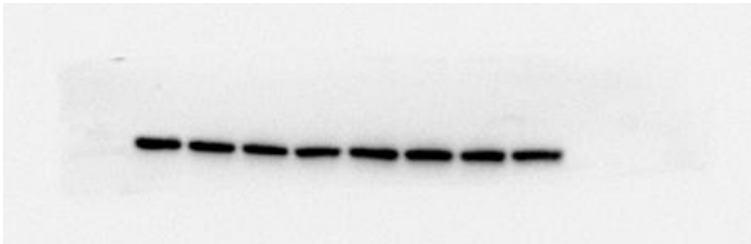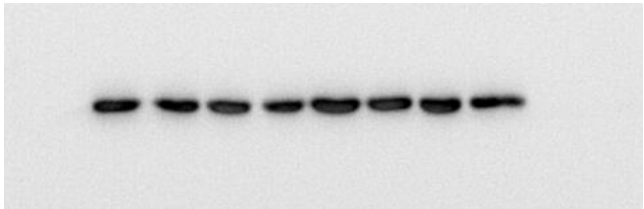

|         |   |   |   |   |   |   |   |   |
|---------|---|---|---|---|---|---|---|---|
| MRS1845 | - | + | - | + | - | + | - | + |
| ZSTK474 | - | - | + | + | - | - | + | + |
| PSG1    | - | - | - | - | + | + | + | + |

|         |   |   |   |   |   |   |   |   |
|---------|---|---|---|---|---|---|---|---|
| MRS1845 | - | + | - | + | - | + | - | + |
| ZSTK474 | - | - | + | + | - | - | + | + |
| PSG1    | - | - | - | - | + | + | + | + |

|         |   |   |   |   |   |   |   |   |
|---------|---|---|---|---|---|---|---|---|
| MRS1845 | - | + | - | + | - | + | - | + |
| ZSTK474 | - | - | + | + | - | - | + | + |
| PSG1    | - | - | - | - | + | + | + | + |
